# Supplementary material for: Cnidarian Pattern Recognition Receptor Repertoires Reflect Both Phylogeny and Life History Traits
Source: Front Immunol. 2021 Jun 23;12:689463. doi: 10.3389/fimmu.2021.689463 (PMC8260672; doi:10.3389/fimmu.2021.689463)
Supplement: Supplementary Table 3 — TLR domains and sequence IDs. [file Table_3.xlsx]

## Sheet: github
All code and pfam input files can be found on https://github.com/Mydlarz-Lab

## Sheet: Actinia
sequence ID	TIR	LRR	TM
XP_031553750.1	1	0	2
XP_031553751.1	1	0	2
XP_031573368.1	1	0	1
XP_031571302.1	1	0	1
XP_031568539.1	1	0	1
XP_031567038.1	1	8	1

## Sheet: Acropora
sequence ID	TIR	LRR	TM
Amillepora00247-RA protein AED:0.16 eAED:0.16 QI:0|0|0|0.4|1	1	0	1
Amillepora11242-RA protein AED:0.35 eAED:0.35 QI:29|1|1|1|1|	1	0	1
Amillepora11232-RA protein AED:0.30 eAED:0.30 QI:29|1|1|1|1|	1	0	1
Amillepora11233-RA protein AED:0.36 eAED:0.36 QI:29|1|1|1|1|	1	0	1
Amillepora11254-RA protein AED:0.04 eAED:0.04 QI:876|1|1|1|0	1	0	1
Amillepora13193-RA protein AED:0.30 eAED:0.35 QI:0|0.75|0.77	1	0	2
Amillepora13042-RA protein AED:0.27 eAED:0.27 QI:305|0.63|0.	1	0	1
Amillepora13041-RA protein AED:0.49 eAED:0.68 QI:0|0|0|0.68|	1	0	2
Amillepora13039-RA protein AED:0.06 eAED:0.06 QI:83|0.66|0.9	1	0	1
Amillepora13196-RA protein AED:0.42 eAED:0.47 QI:0|0.5|0.6|1	1	0	1
Amillepora26793-RA protein AED:0.33 eAED:0.33 QI:0|-1|0|1|-1	1	3	1
Amillepora26786-RA protein AED:0.31 eAED:0.31 QI:0|-1|0|1|-1	1	3	1
Amillepora26798-RA protein AED:0.11 eAED:0.11 QI:0|-1|0|1|-1	1	1	1
Amillepora26785-RA protein AED:0.92 eAED:1.00 QI:0|-1|0|1|-1	1	3	1
Amillepora26784-RA protein AED:0.70 eAED:1.00 QI:0|-1|0|1|-1	1	3	1
Amillepora26794-RA protein AED:0.33 eAED:0.33 QI:0|-1|0|1|-1	1	3	1
Amillepora26796-RA protein AED:0.52 eAED:0.50 QI:0|-1|0|1|-1	1	1	1
Amillepora26783-RA protein AED:0.52 eAED:0.31 QI:0|-1|0|1|-1	1	2	1
Amillepora26797-RA protein AED:1.00 eAED:1.00 QI:0|-1|0|1|-1	1	3	1
Amillepora26795-RA protein AED:0.91 eAED:0.33 QI:0|-1|0|1|-1	1	3	1

## Sheet: Amphinedon
sequence ID	TIR	LRR	TM
N/A	N/A	N/A	N/A

## Sheet: Aurelia
sequence ID	TIR	LRR	TM
Seg112.8	1	0	1

## Sheet: Calavadosia
sequence ID	TIR	LRR	TM
Ccrux.Trinity.21036	1	0	1
Ccrux.Trinity.21039	1	0	1
Ccrux.Trinity.21040	1	0	2

## Sheet: Cassiopea
sequence ID	TIR	LRR	TM
evm.model.Scaffold_40168_HRSCAF=40561.876	1	0	1
evm.model.Scaffold_40168_HRSCAF=40561.882	1	0	1
evm.model.Scaffold_40168_HRSCAF=40561.883	1	0	2
evm.model.Scaffold_117_HRSCAF=135.527.1.5d579b3a	1	0	1

## Sheet: Clytia
sequence ID	TIR	LRR	TM
N/A	N/A	N/A	N/A

## Sheet: Dendronephyta
sequence ID	TIR	LRR	TM
XP_028402014.1	1	0	1
XP_028402015.1	1	0	1
XP_028402016.1	1	0	1
XP_028414772.1	1	4	1
XP_028399899.1	1	4	1
XP_028399839.1	1	2	1
XP_028414781.1	1	1	1

## Sheet: Exaiptasia
sequence ID	TIR	LRR	TM
XP_020910854.2	1	0	2

[truncated: 7 more sheets: Hydra, Montipora, Morbakka, Nematostella, Orbicella, Pocillopora, Xenia]
